# Supplementary material
Source: PubMed Central journal article supplement (PMC5777251)
Supplement: 10.1074_M117.813493_jbc.M117.813493-1.pdf [file 10.1074_M117.813493_jbc.M117.813493-1.pdf]

NMR-Directed Design of PreTCR $\beta$  and pMHC Molecules Implies a Distinct Geometry for preTCR  
Relative to  $\alpha\beta$ TCR Recognition of pMHC

Robert J. Mallis<sup>1</sup>, Haribabu Arthanari<sup>1,2</sup>, Matthew J. Lang<sup>3</sup>, Ellis L. Reinherz<sup>4</sup>, and Gerhard Wagner<sup>1\*</sup>

List of Supplementary Material

Figure S1

Supplementary References

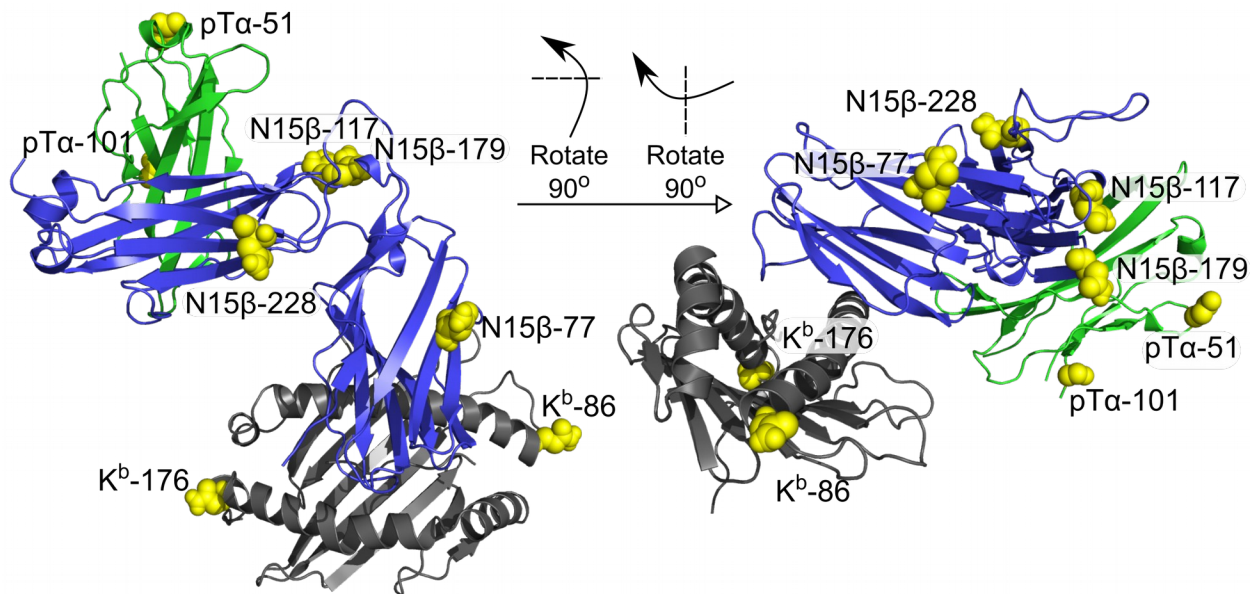

**SUPPLEMENTARY FIGURE 1.** Glycosylation sites and pT $\alpha$  location relative to proposed interaction surfaces. Two views of the complex model conformer 1 (Fig. 10D) illustrating the position of pT $\alpha$ , added by superposition of C $\beta$  from 3OF6 (1) onto the C $\beta$  of N15 $\beta$ , and the conserved glycosylation acceptor Asn residues. Eight conserved glycosylation sites are found in this complex, two on H-2K $^b$  (2), four on N15 $\beta$  (3), and two on pT $\alpha$  (1,4). Colors are as in Fig 10D with pT $\alpha$  in green and Asn sites in yellow spheres.

## SUPPLEMENTARY REFERENCES

1. Pang, S.S., Berry, R., Chen, Z., Kjer-Nielsen, L., Perugini, M.A., King, G.F., Wang, C., Chew, S.H., La Gruta, N.L., Williams, N.K., Beddoe, T., Tiganis, T., Cowieson, N.P., Godfrey, D.I., Purcell, A.W., Wilce, M.C.J., McCluskey, J., Rossjohn, J. (2010) The structural basis for autonomous dimerization of the pre-T-cell antigen receptor. *Nature* **467**, 844-8.
2. Powell, L.D., Smith, K., Hart, G.W. (1987) Site specific glycosylation patterns of H-2K: effects of allelic polymorphism and mitogenic stimulation. *Journal of Immunology* **139**, 1206-1213.
3. Wang, J., Lim, K., Smolyar, A., Teng, M., Liu, J., Tse, A.G., Liu, J., Hussey, R.E., Chishti, Y., Thomson, C.T., Sweet, R.M., Nathenson, S.G., Chang, H.C., Sacchettini, J.C., Reinherz, E.L. (1998) Atomic structure of an alphabeta T cell receptor (TCR) heterodimer in complex with an anti-TCR fab fragment derived from a mitogenic antibody. *EMBO J.* **17**, 10-26.
4. Zhou, B., Chen, Q., Mallis, R.J., Zhang, H., Liu, J.-H., Reinherz, E.L., Wang, J.-H. (2011) A Conserved Hydrophobic Patch on V $\beta$  Domains Revealed by TCR $\beta$  Chain Crystal Structures: Implications for Pre-TCR Dimerization. *Front. Immunol.* **2**, 5.
